# Supplementary material for: Lipidomic Analysis of Archival Pathology Specimens Identifies Altered Lipid Signatures in Ovarian Clear Cell Carcinoma
Source: MDPI journal article supplement (doi:10.3390/metabo11090597), 2021-09-03

**Supplementary Figure S1:** Relative distribution of different lipid species represented as percent of the total class levels **(A)** PC species > 1% and **(B)** PC species < 1% of the total; **(C)** PE; **(D)** PI; **(E)** SM species > 1% and **(F)** SM species < 1% of the total

**(A)**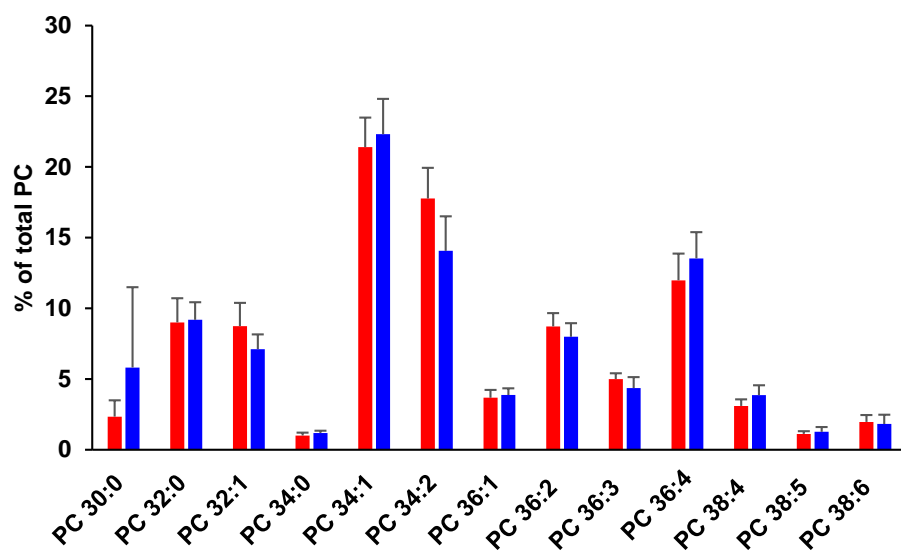**(B)**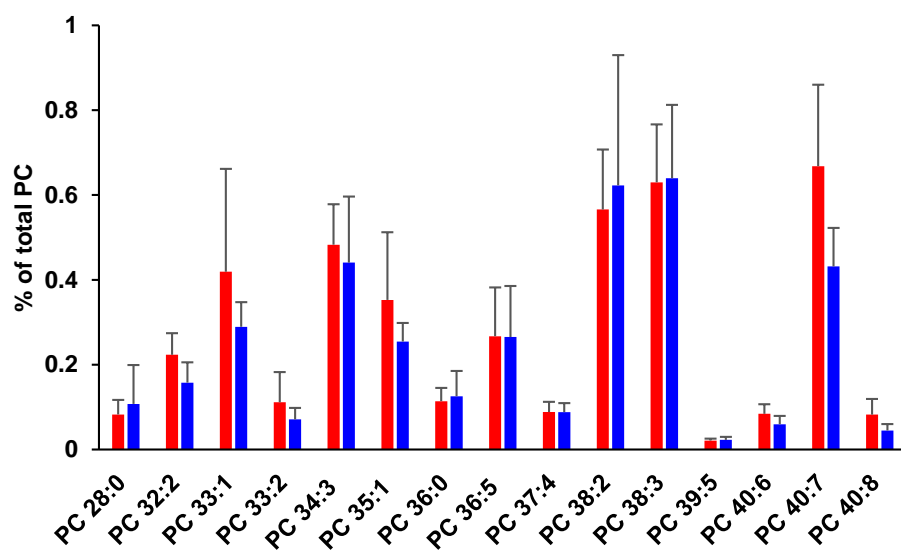**(C)**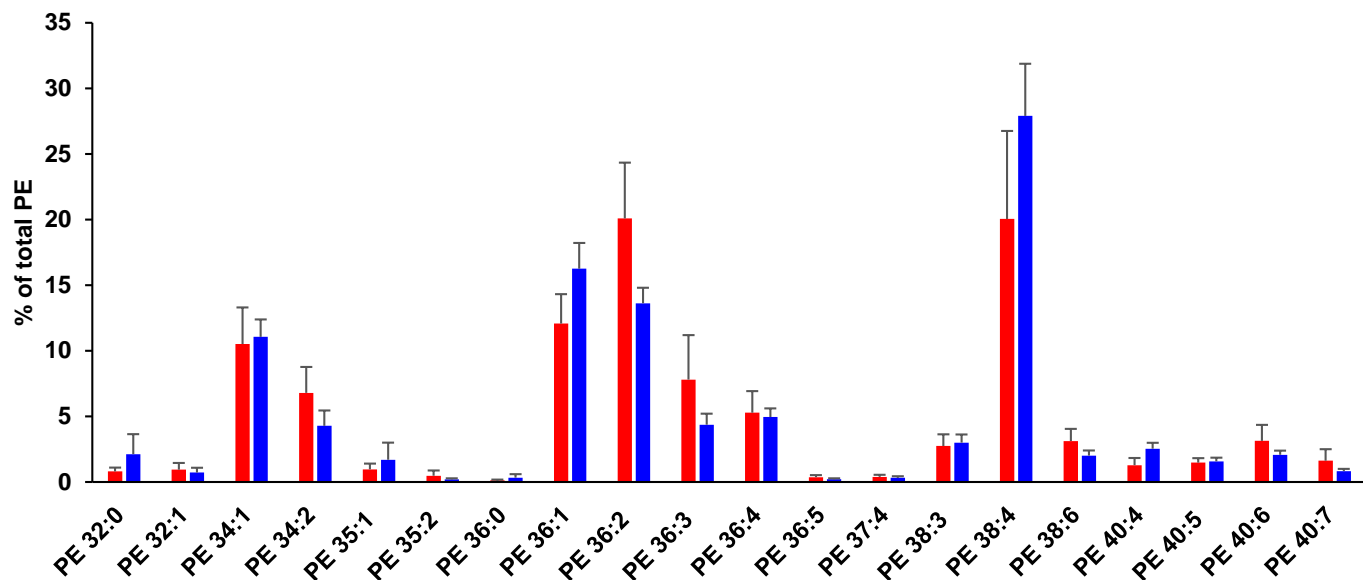

(D)

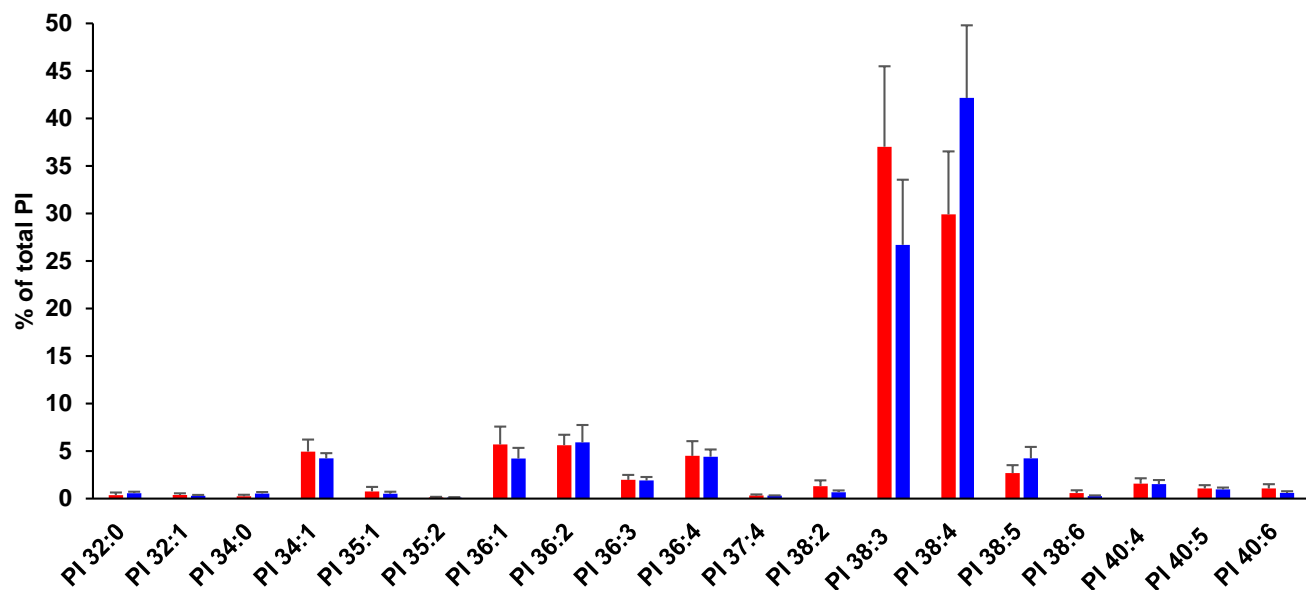

(E)

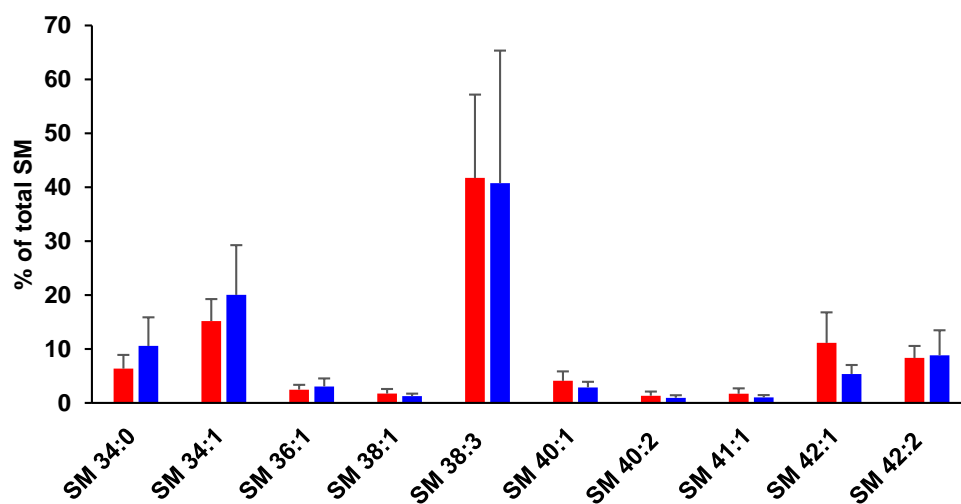

(F)

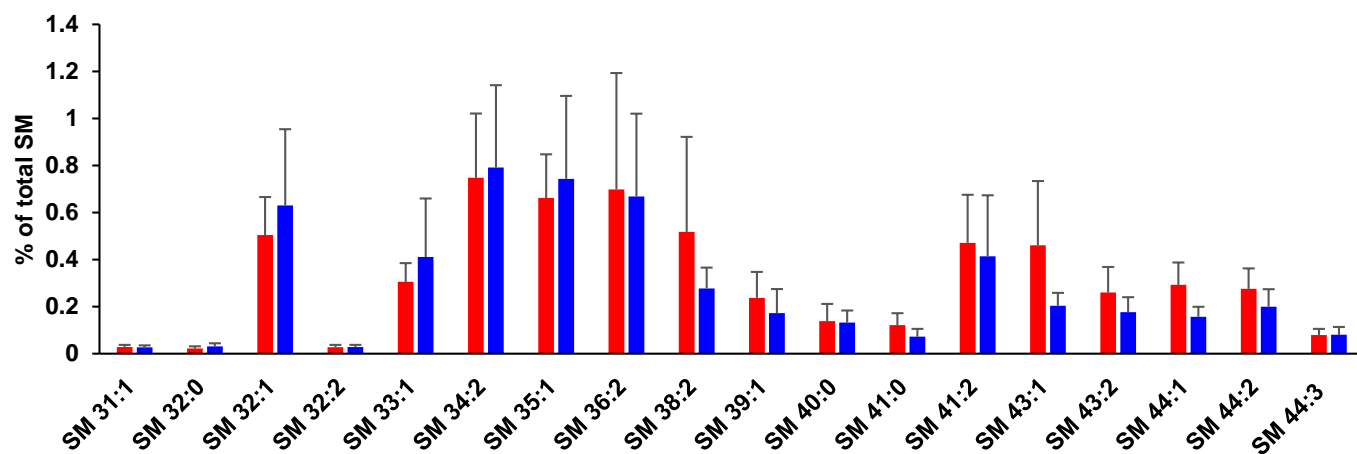

Supplement: s1 [file s1]
